# Supplementary material for: Identification of Potential Factors for the Promotion of Fucoxanthin Synthesis by Methyl Jasmonic Acid Treatment of Phaeodactylum tricornutum
Source: MDPI journal article supplement (doi:10.3390/md22010007), 2023-12-20
Supplement: s1 [file s1]

**Table S1.** The top 10 similar sequences obtained by BLAST sequence alignment.

| <b>Describe</b>                                       | <b>Species</b>                         | <b>Score</b> | <b>Similarity</b> | <b>E value</b>        |
|-------------------------------------------------------|----------------------------------------|--------------|-------------------|-----------------------|
| Predicted protein                                     | <i>P. tricornutum</i> CCAP<br>1055/1   | 481          | 100%              | 2.00E <sup>-171</sup> |
| SDR family<br>NAD(P)-dependent<br>oxidoreductase      | <i>Oceanibium sediminis</i>            | 248          | 100%              | 1.00E <sup>-79</sup>  |
| SDR family<br>NAD(P)-dependent<br>oxidoreductase      | <i>Marinobacter</i> sp. PJ-16          | 232          | 98%               | 3.00E <sup>-73</sup>  |
| short-chain dehydrogenase                             | <i>Marinobacter</i> sp. B9-2           | 231          | 98%               | 6.00E <sup>-73</sup>  |
| SDR family<br>NAD(P)-dependent<br>oxidoreductase      | <i>Marinobacter</i> sp. NP-4<br>(2019) | 229          | 98%               | 7.00E <sup>-72</sup>  |
| SDR family<br>NAD(P)-dependent<br>oxidoreductase      | <i>Persicimonas caeni</i>              | 228          | 98%               | 2.00E <sup>-71</sup>  |
| SDR family<br>NAD(P)-dependent<br>oxidoreductase      | <i>Persicimonas caeni</i>              | 228          | 98%               | 2.00E <sup>-71</sup>  |
| TPA: SDR family<br>NAD(P)-dependent<br>oxidoreductase | <i>Marinobacter</i> sp. nov.           | 227          | 98%               | 5.00E <sup>-71</sup>  |
| SDR family<br>NAD(P)-dependent<br>oxidoreductase      | <i>Marinobacter</i> sp. ELB17          | 226          | 98%               | 1.00E <sup>-70</sup>  |
| SDR family<br>NAD(P)-dependent<br>oxidoreductase      | <i>Marinobacter</i> sp.<br>BSs20148    | 226          | 98%               | 1.00E <sup>-70</sup>  |
